# Supplementary material
Source: publisher figshare collection journal article supplement (https://frontiersin.figshare.com/ndownloader/files/26868416)
Supplement: Supplementary file 1 [file 26868416]

## Supplementary Material

### 1 SUPPLEMENTARY TABLES AND FIGURES

#### 1.1 Figures

Did Emily Brown have any financial problems?

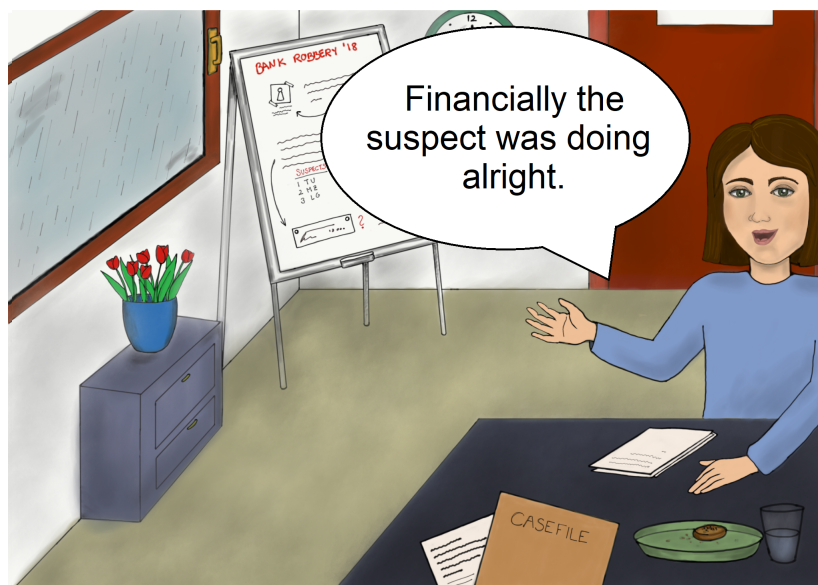

#### Evidence:

Statement of Emily Brown's friend 20/12/2019

Name: Greta Lawson

Born: 01.02.1982

Issue: Emily Brown's financial situation

Campbell: "Did Emily Brown mention anything about her financial situation?"

Greta Lawson: "She mentioned that she wishes to win in the lottery to buy that house in the south of France that she wanted for so long."

**Figure S1.** Experimental item example: Briefing about the suspect Emily Brown (weak evidence manipulation).

## Did Emily Brown have any financial problems?

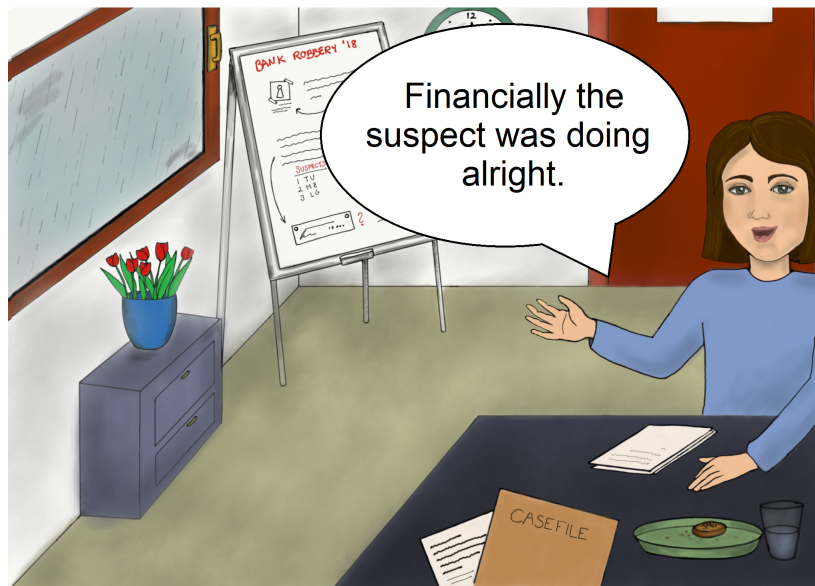

### Evidence:

**HARRIOT BANK**

RETURN SERVICE REQUESTED

Emily Brown  
2/1 South Bridge  
EH1 1LL Edinburgh

**Statement Ending 30/11/2019**  
Page 1 of 4

**Managing Your Accounts**

- Primary Branch: Edinburgh
- Phone Number: XXXXX XXXXX
- Online Banking: HarriotBank.com
- Mailing Address: 2/1 South Bridge EH1 1LL, Edinburgh

**Summary of Accounts**

| Account Type                  | Account Number | Ending Balance |
|-------------------------------|----------------|----------------|
| HARRIOT RELATIONSHIP CHECKING | XXXXXXXXX4101  | £ -15,045      |

**Primary Checking**

| Date       | Description       | Amount    |
|------------|-------------------|-----------|
| 01/11/2019 | Beginning Balance | £ -9,000  |
| 30/11/2019 | Ending Balance    | £ -15,045 |

Emily Brown's bank statement from November 2019

**Figure S2.** Experimental item example: Briefing about the suspect Emily Brown (strong evidence manipulation).

Did you have any financial problems?

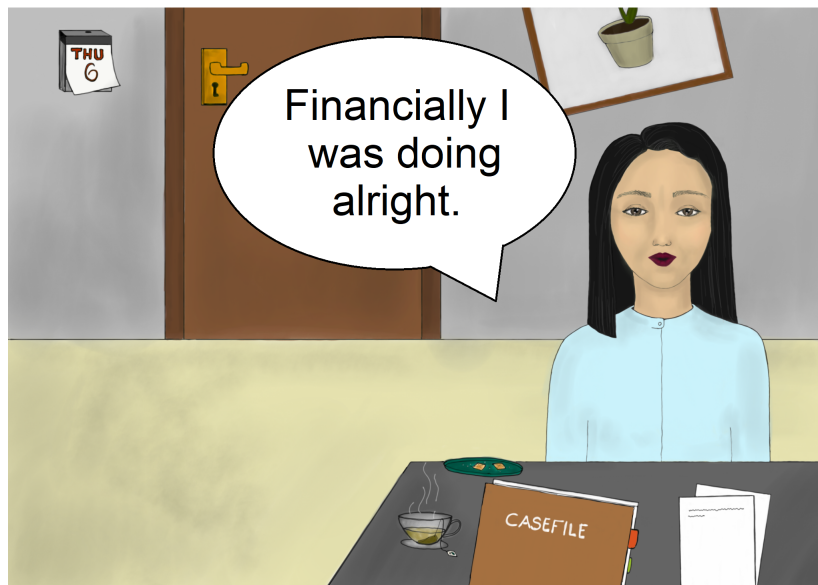

Evidence:

Statement of Emily Brown's friend 20/12/2019

Name: Greta Lawson

Born: 01.02.1982

Issue: Emily Brown's financial situation

Campbell: "Did Emily Brown mention anything about her financial situation?"

Greta Lawson: "She mentioned that she wishes to win in the lottery to buy that house in the south of France that she wanted for so long."

**Figure S3.** Experimental item example: Interrogation with suspect Emily Brown (weak evidence manipulation).

Did you have any financial problems?

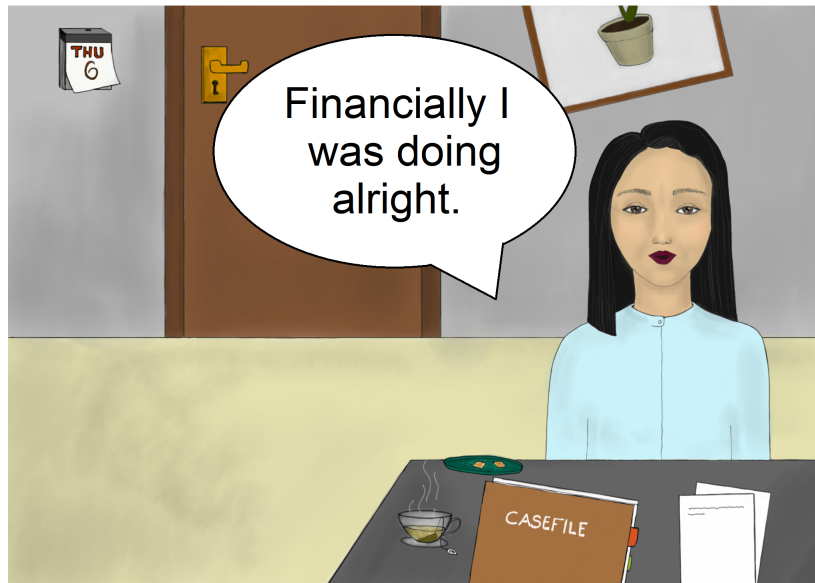

Evidence:

**HARRIOT BANK**

RETURN SERVICE REQUESTED

Emily Brown  
2/1 South Bridge  
EH1 1LL, Edinburgh

**Statement Ending 30/11/2019**  
Page 1 of 4

**Managing Your Accounts**

- Primary Branch: Edinburgh
- Phone Number: XXXXX XXXXXX
- Online Banking: HarriotBank.com
- Mailing Address: 2/1 South Bridge EH1 1LL, Edinburgh

**Summary of Accounts**

| Account Type                  | Account Number | Ending Balance |
|-------------------------------|----------------|----------------|
| HARRIOT RELATIONSHIP CHECKING | XXXXXXXXX4101  | £ -15,045      |

**Primary Checking**

| Account Summary |                   | Amount    |
|-----------------|-------------------|-----------|
| Date            | Description       |           |
| 01/11/2019      | Beginning Balance | £ -9,000  |
| 30/11/2019      | Ending Balance    | £ -15,045 |

Emily Brown's bank statement from November 2019

**Figure S4.** Experimental item example: Interrogation with suspect Emily Brown (strong evidence manipulation).



Where was Johanna Smith on the night of the theft?

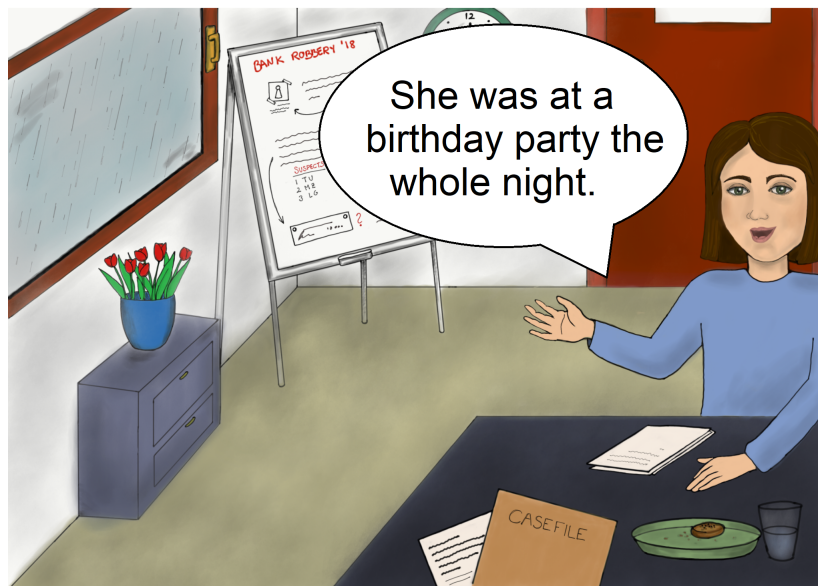

Evidence:

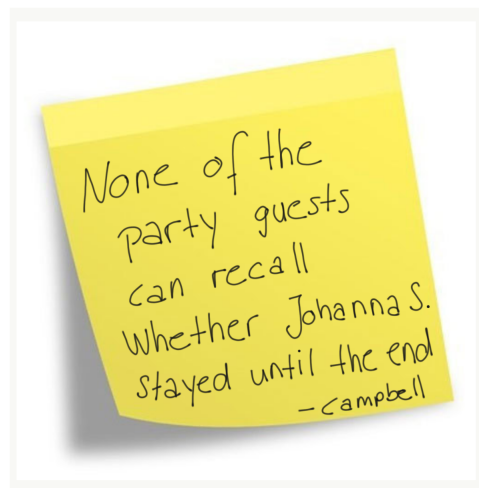

**Figure S5.** Experimental item example: Briefing about the suspect Johanna Smith (weak evidence manipulation).

Where was Johanna Smith on the night of the theft?

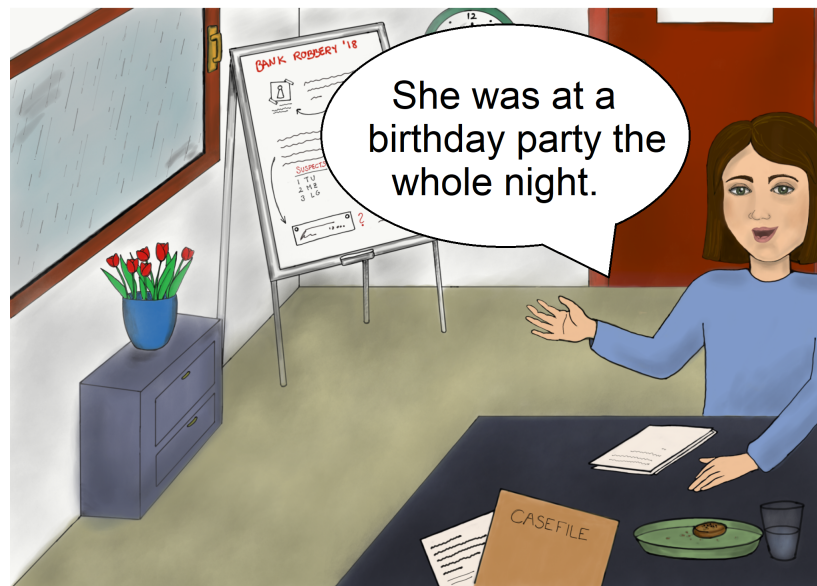

Evidence:

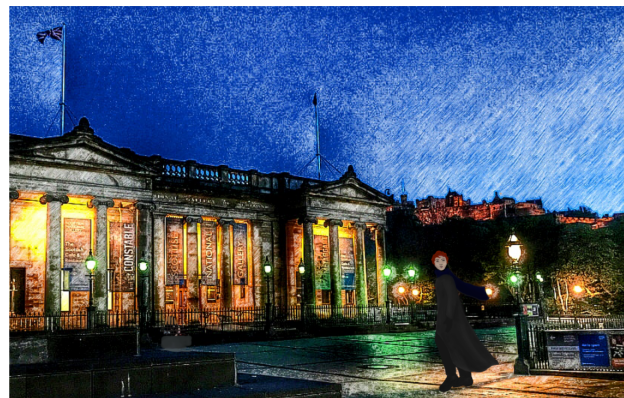

Video footage of Johanna Smith heading towards the national gallery during the time of the party.

**Figure S6.** Experimental item example: Briefing about the suspect Johanna Smith (strong evidence manipulation).

Where were you on the night of the theft?

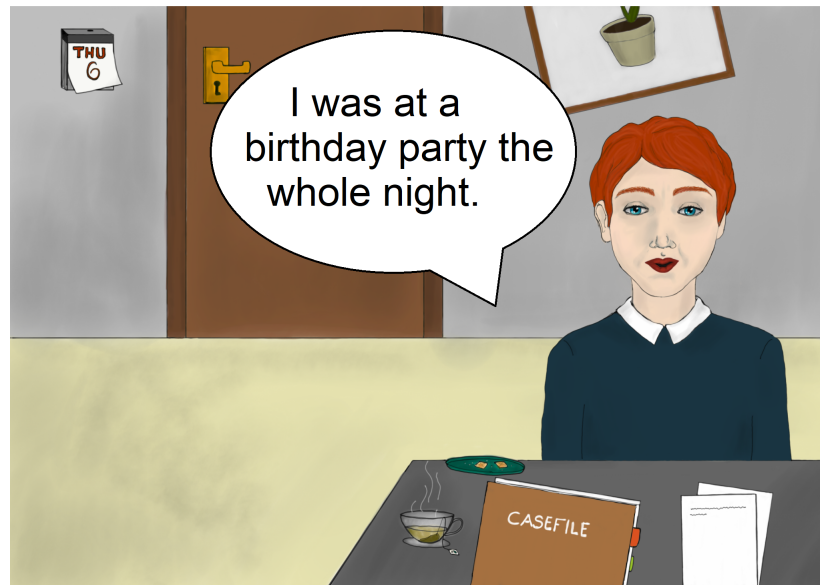

Evidence:

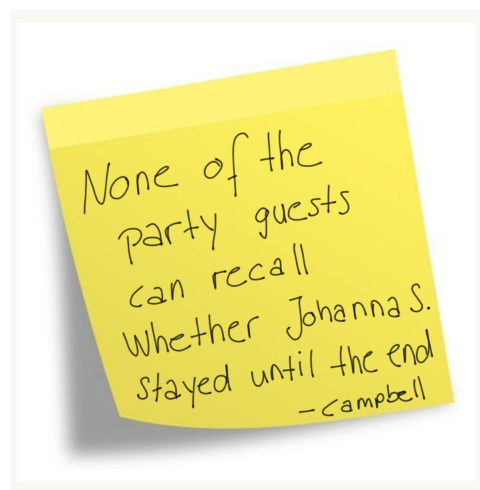

**Figure S7.** Experimental item example: Interrogation with the suspect Johanna Smith (weak evidence manipulation).

Where were you on the night of the theft?

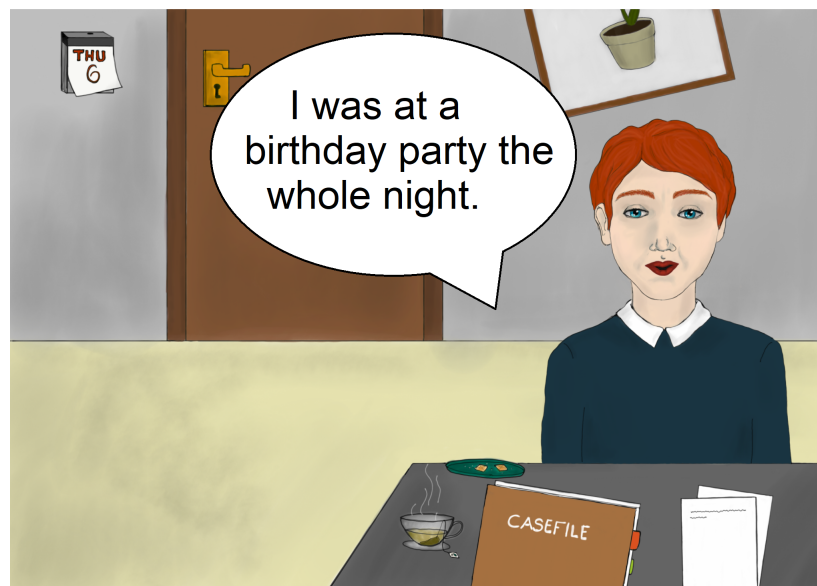

Evidence:

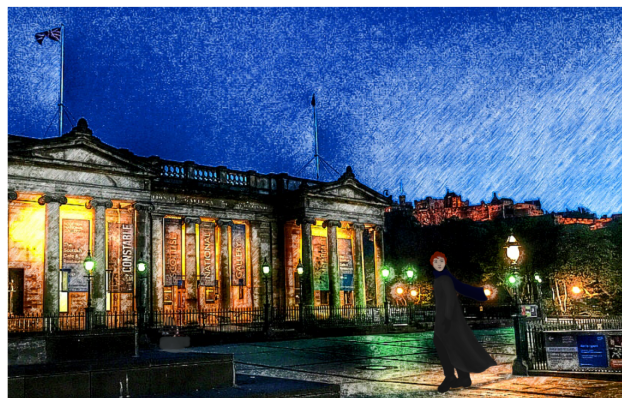

Video footage of Johanna Smith heading towards the national gallery during the time of the party.

**Figure S8.** Experimental item example: Interrogation with the suspect Johanna Smith (strong evidence manipulation).
